# Supplementary material
Source: PubMed Central journal article supplement (PMC4492394)

-  = Exposure
-  = Outcome
-  = Ancestor of outcome (potential mediator)
-  = Ancestor of exposure and outcome (potential confounder)
-  = Causal pathway
-  = Biasing pathway

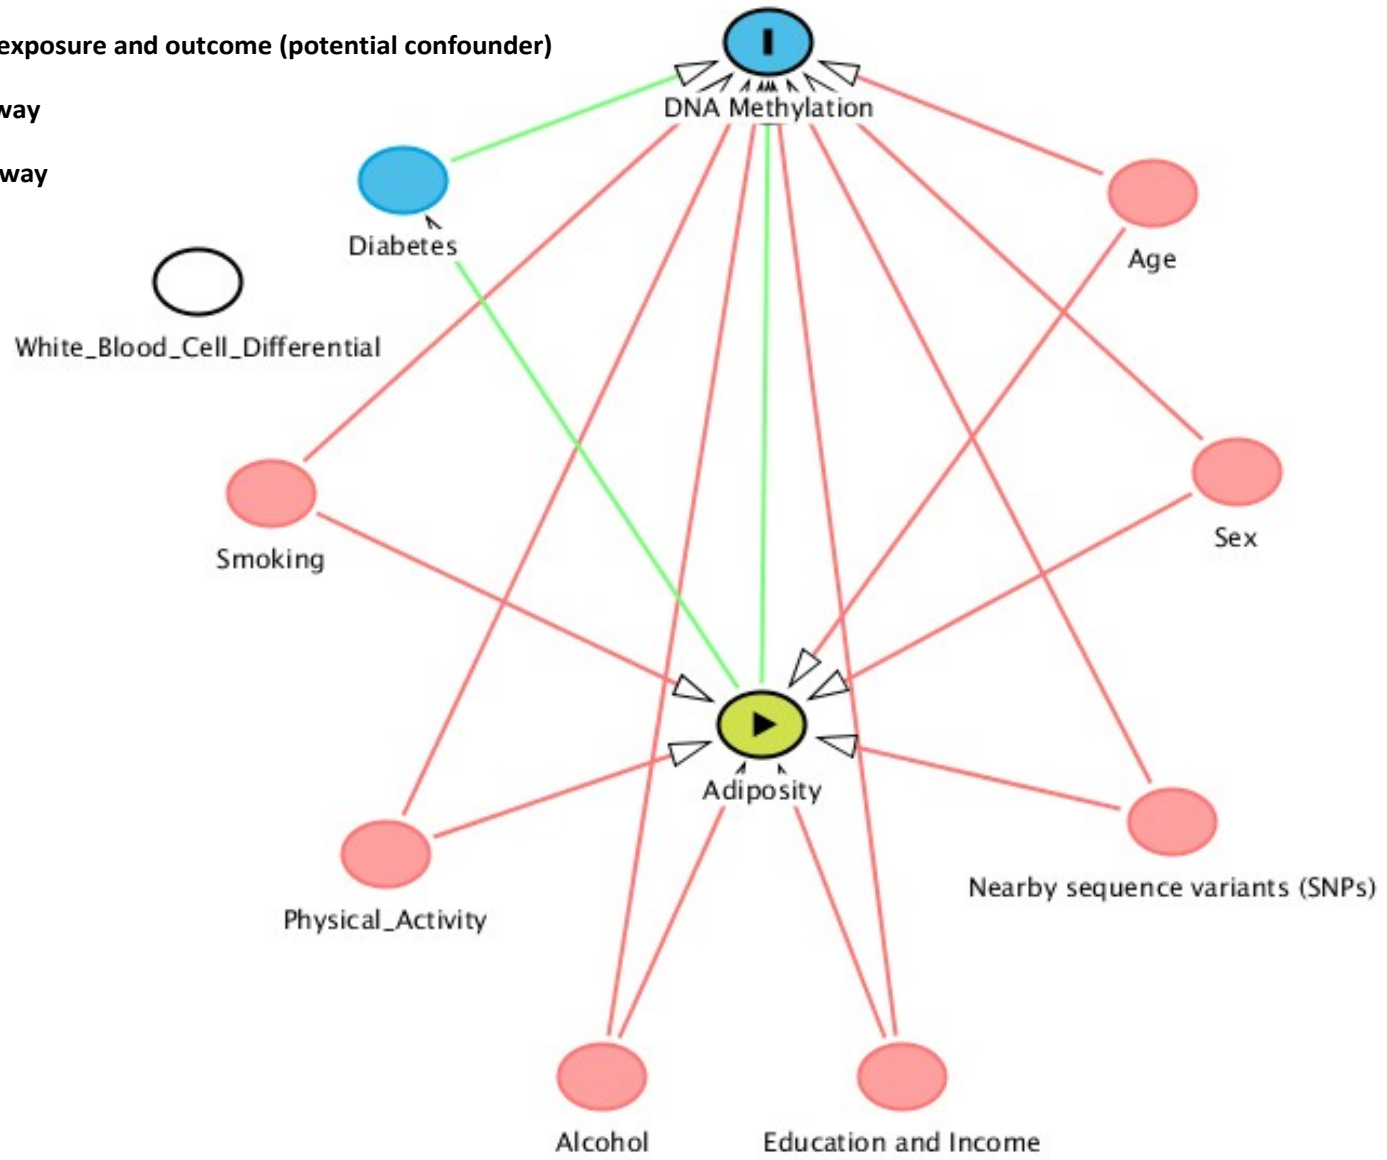

Supplement: supp_ddv161_ddv161supp_fig1.pdf [file supp_ddv161_ddv161supp_fig1.pdf]
